# Supplementary material for: Validation of a modelling methodology for wind turbine rotor blades based on a full scale blade test
Source: Copernicus journal article supplement (doi:10.5194/wes-2021-24), 2021-04-29

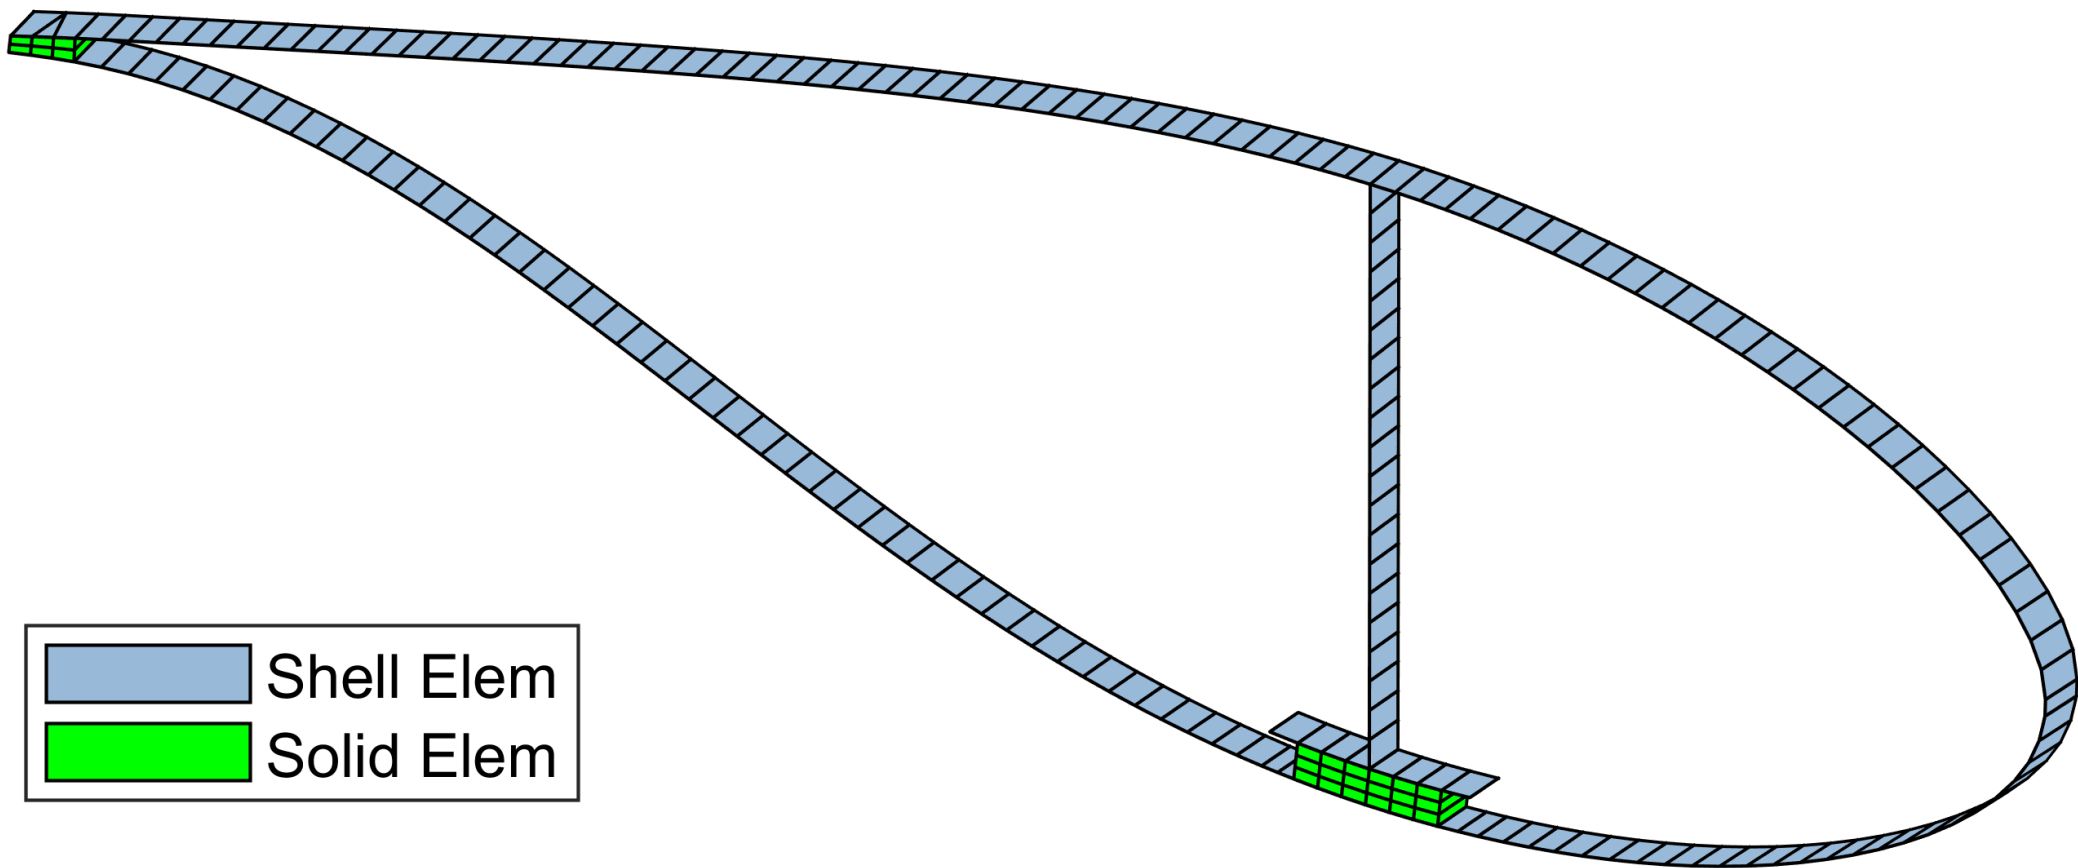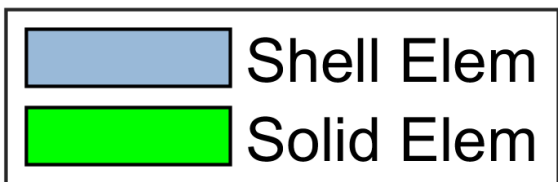

Supplement: Supplementary file [file wes-2021-24-AC1-supplement.pdf]
